# Supplementary material for: Application of Alcohols to Inhibit the Formation of Ca(II) Dodecyl Sulfate Precipitate in Aqueous Solutions
Source: MDPI journal article supplement (doi:10.3390/ma17081806), 2024-04-15
Supplement: s1 [file s1]

## Application of Alcohols to Inhibit the Formation of Ca(II) Dodecyl Sulfate Precipitate in Aqueous Solutions

Supporting information

S1

Table S1. Viscosity (cP) and refractive index of the applied alcohol–water solvents

| Solvent                     | Refractive index | Viscosity (cP) |
|-----------------------------|------------------|----------------|
| water                       | 1.330            | 0.8872         |
| 5.0 V/V% MeOH               | 1.336            | 1.163          |
| 10 V/V% MeOH                | 1.3372           | 1.243          |
| 20 V/V% MeOH                | 1.3385           | 1.368          |
| 5.0 V/V% EtOH               | 1.334            | 1.2            |
| 10 V/V% EtOH                | 1.3405           | 1.265          |
| 20 V/V% EtOH                | 1.3462           | 1.639          |
| 5.0 V/V% <i>n</i> -propanol | 1.34             | 1.32           |
| 10 V/V% <i>n</i> -propanol  | 1.3425           | 1.324          |
| 20 V/V% <i>n</i> -propanol  | 1.3449           | 1.522          |
| 5.0 V/V% <i>n</i> -butanol  | 1.3392           | 1.059          |

S2

Correlation diagrams of dynamic light scattering measurements processed in alcohol containing media

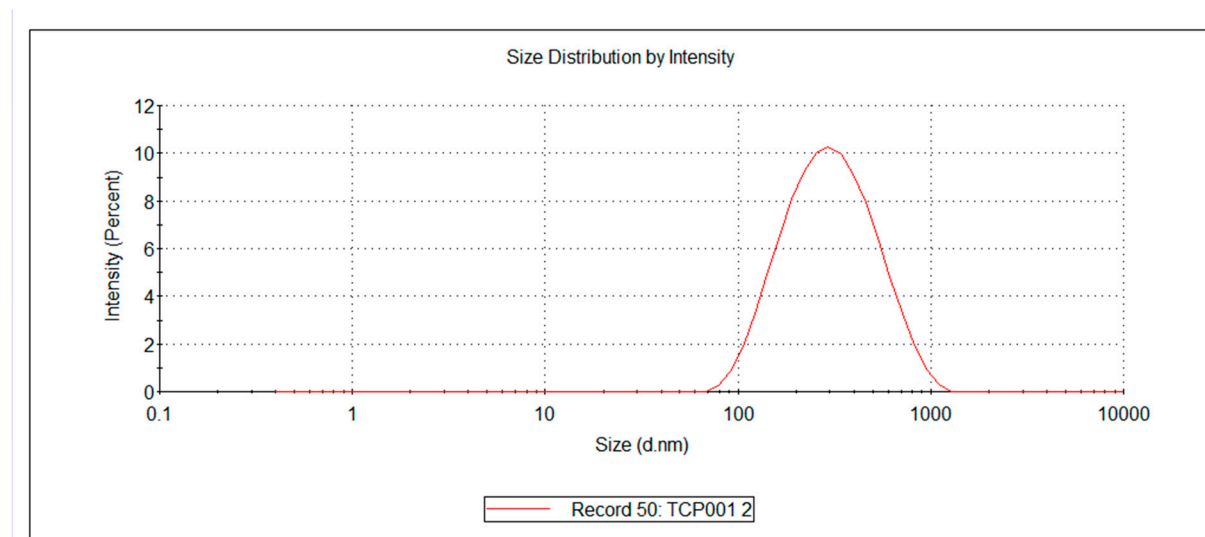

Figure S1. 0.1 g/L SDS

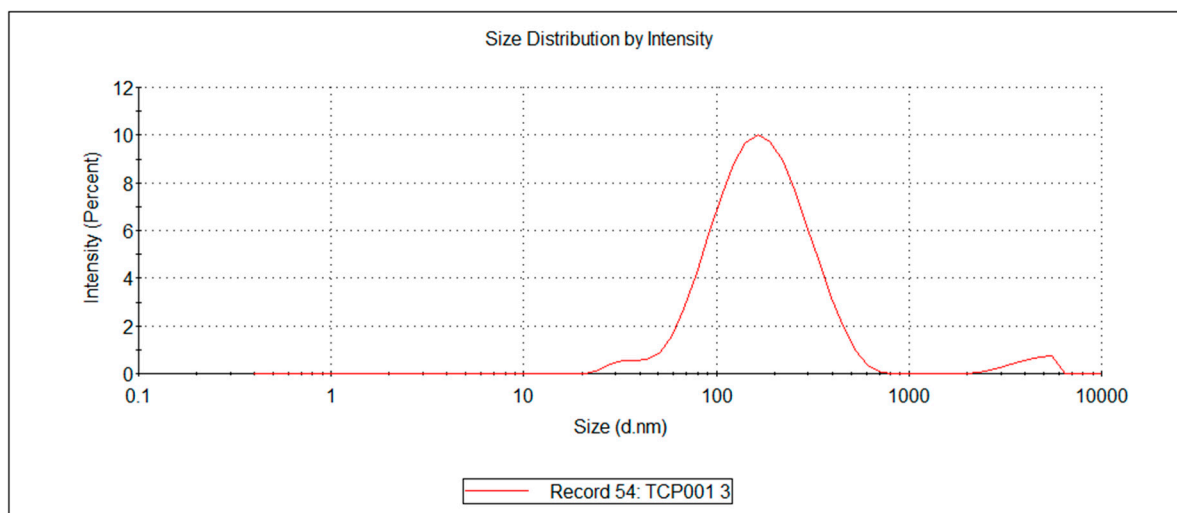

Figure S2. 0.5 g/L SDS

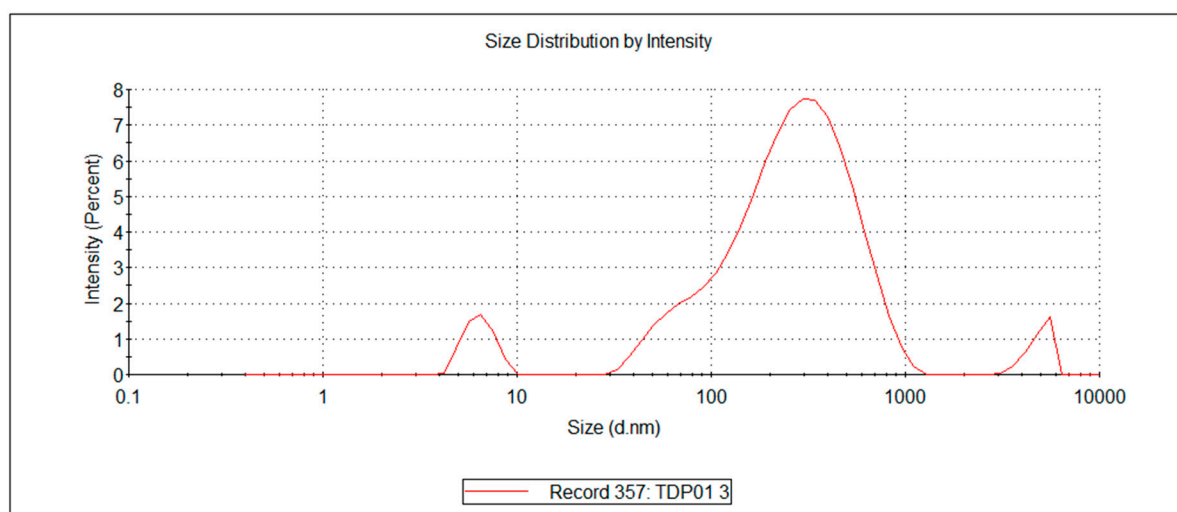

Figure S3. 1.0 g/L SDS

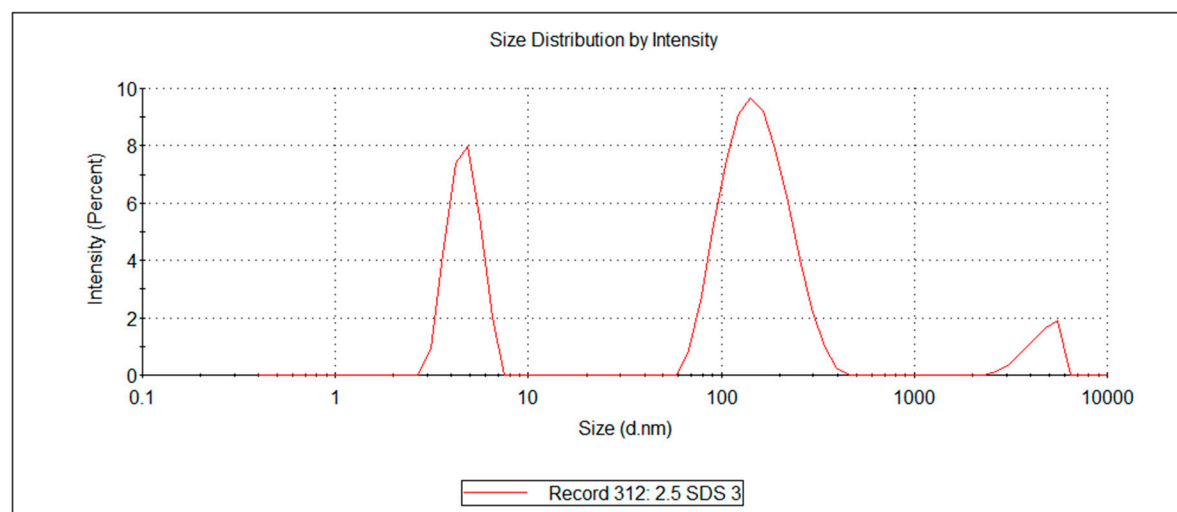

Figure S4. 2.5 g/L SDS

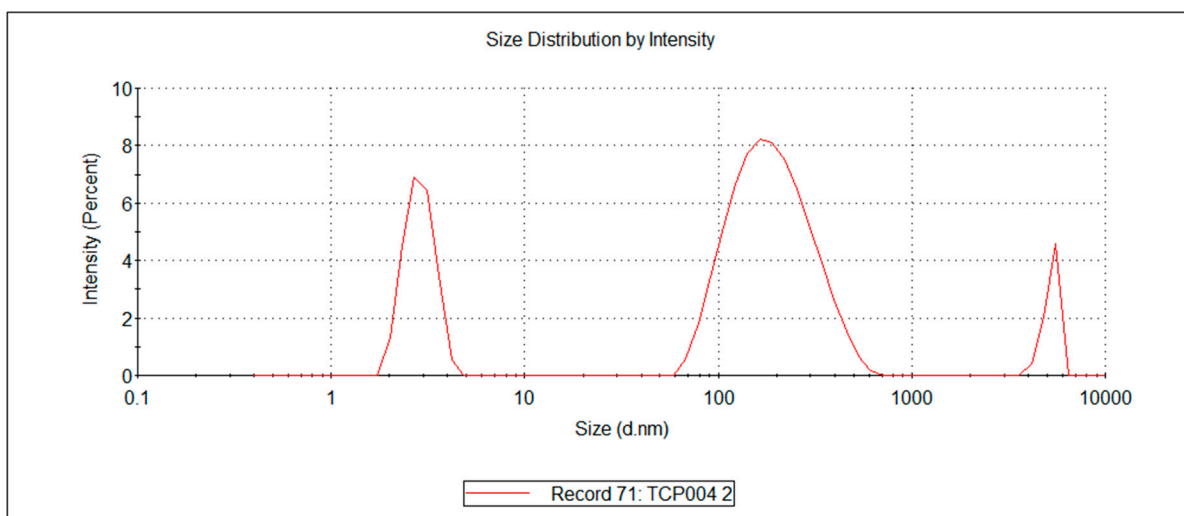

Figure S5. 5.0 g/L SDS

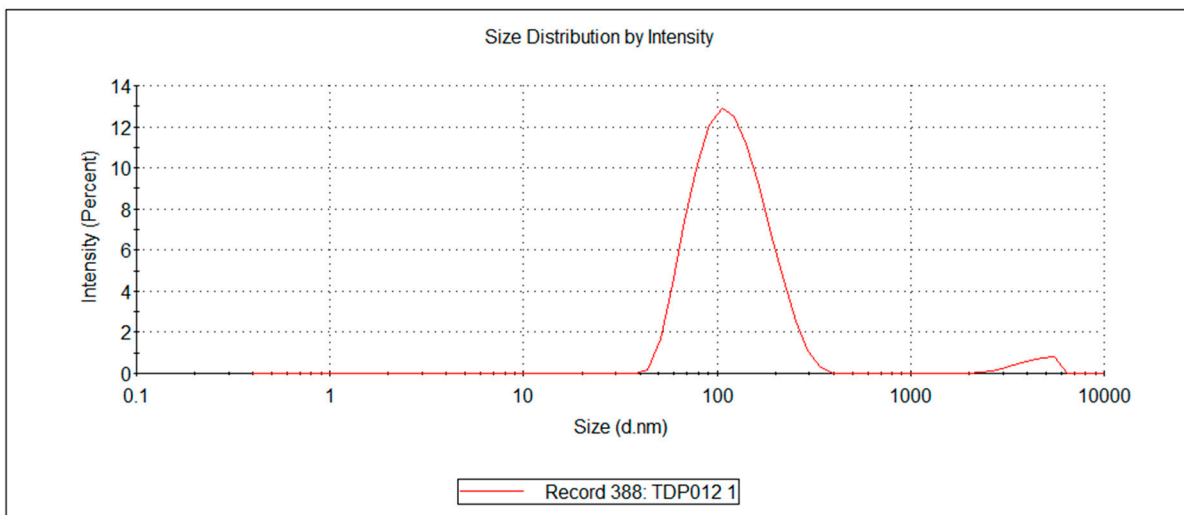

Figure S6 0.5 g/L SDS, 5.0 V/V% MeOH

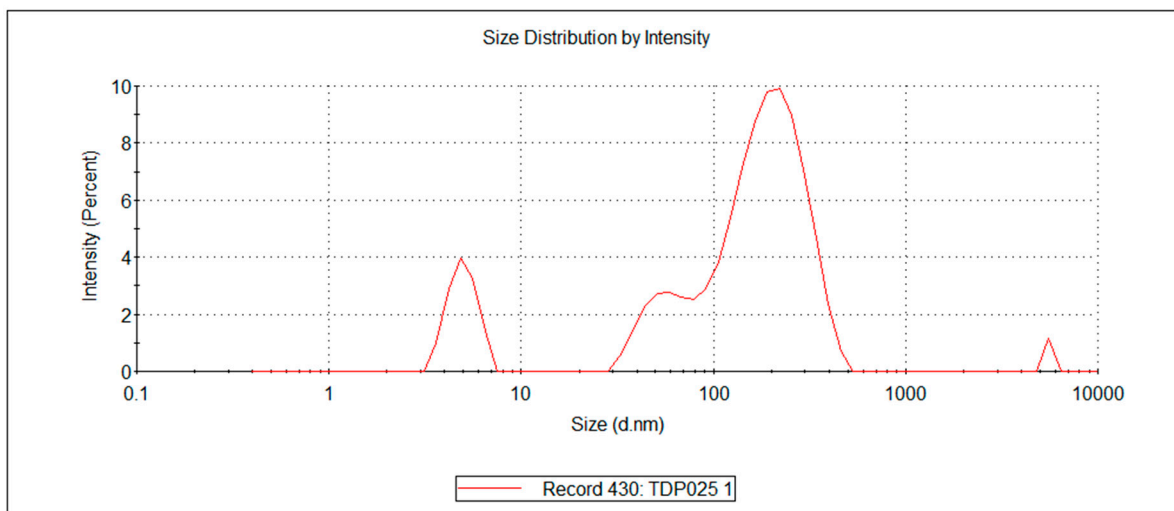

Figure S7. 1.0 g/L SDS, 5.0 V/V% MeOH

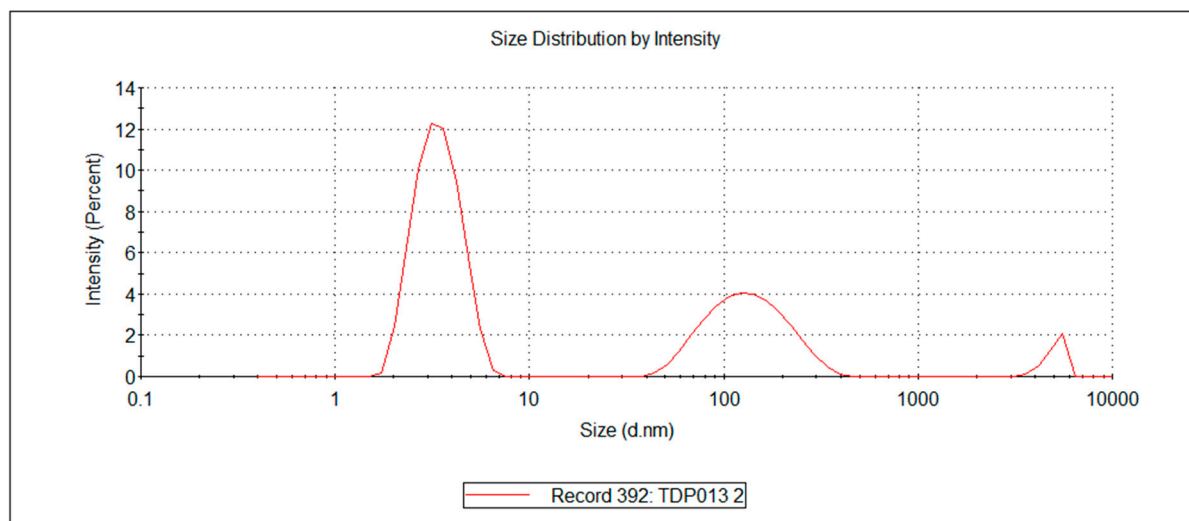

Figure S8. 2.5 g/L SDS, 5.0 V/V% MeOH

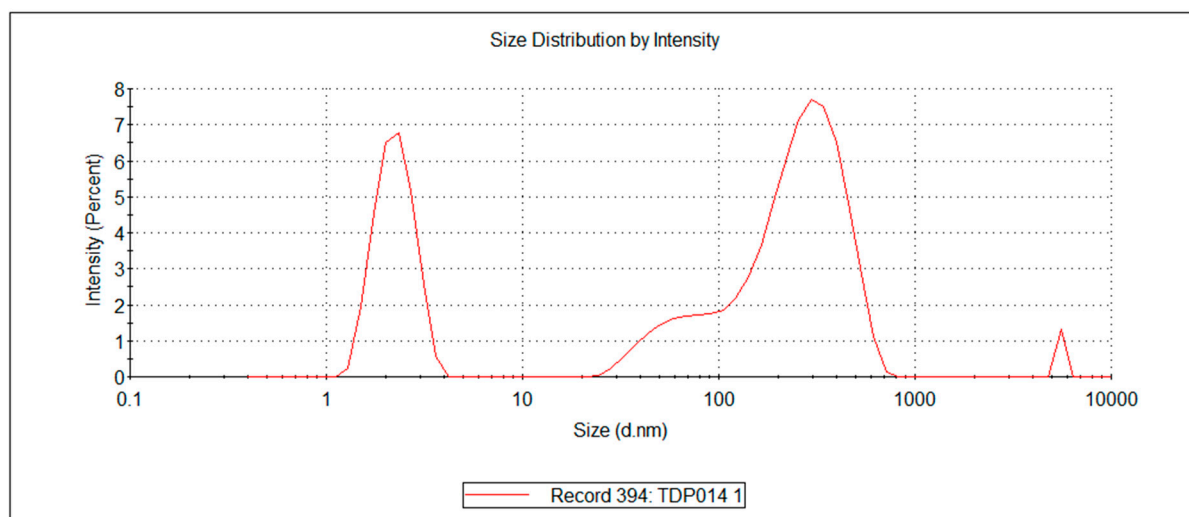

Figure S9. 5.0 g/L SDS, 5.0 V/V% MeOH

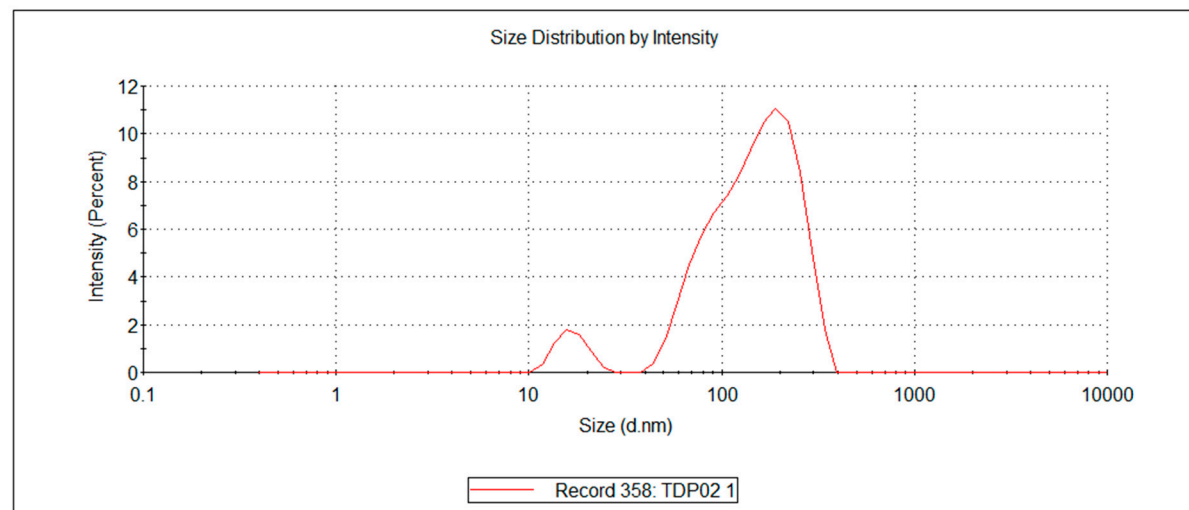

Figure S10. 0.5 g/L SDS, 5.0 V/V% MeOH

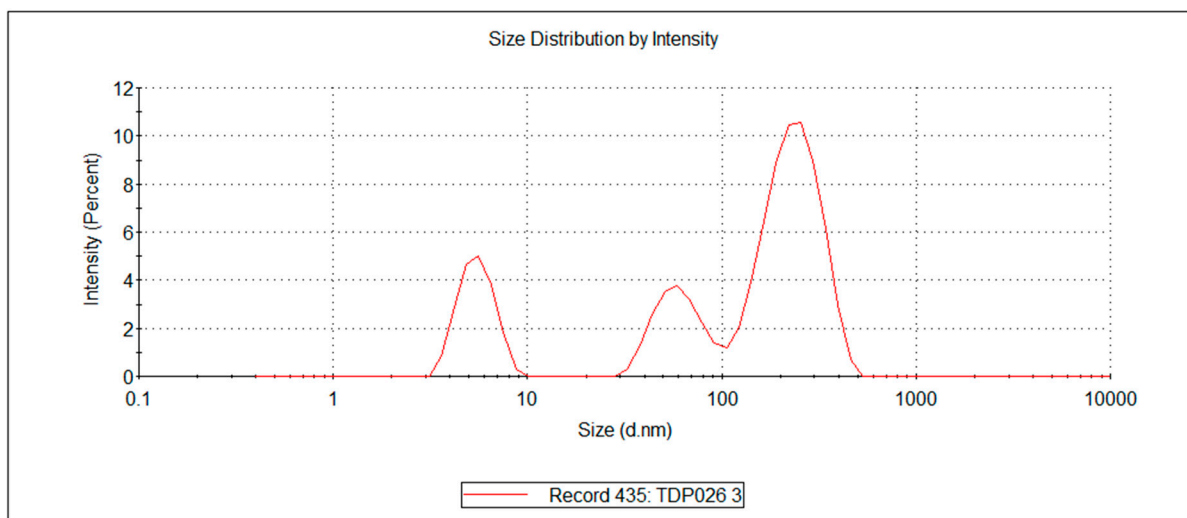

Figure S11. 1.0 g/L SDS, 10.0 V/V% MeOH

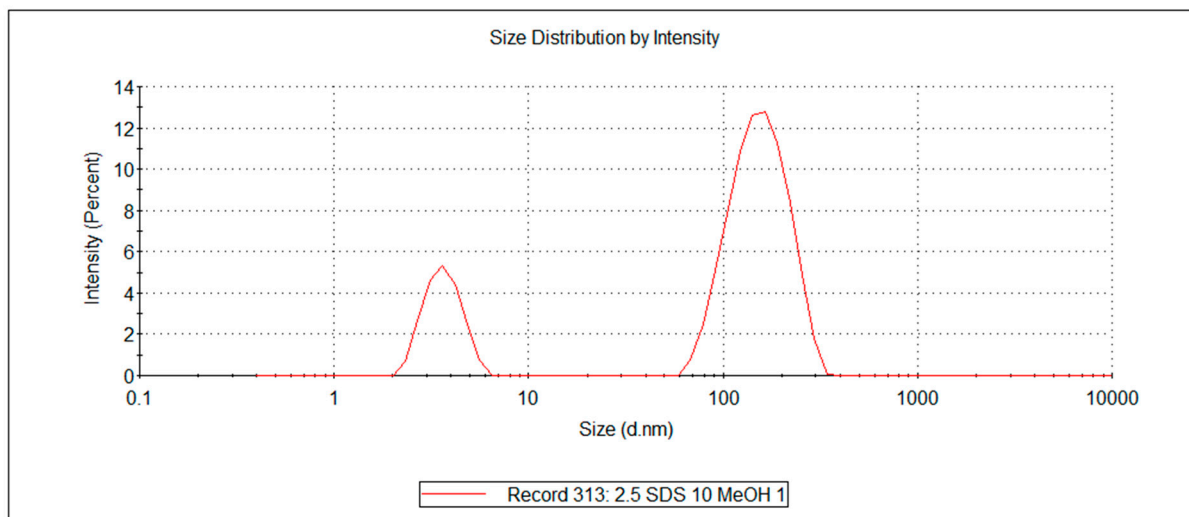

Figure S12. 2.5 g/L SDS, 10.0 V/V% MeOH

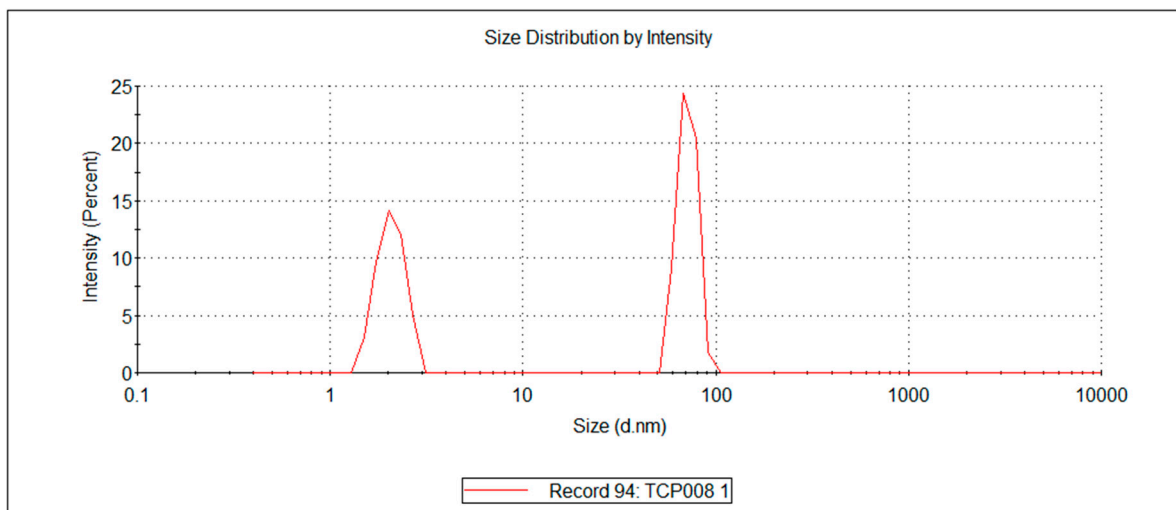

Figure S13. 5.0 g/L SDS, 10.0 V/V% MeOH

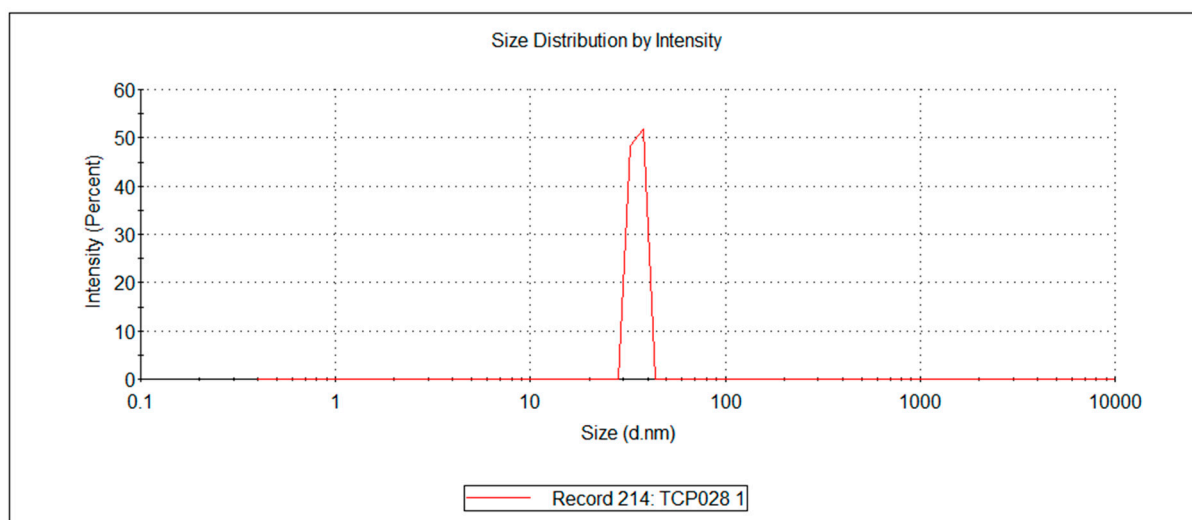

Figure S14. 0.5 g/L SDS, 20.0 V/V% MeOH

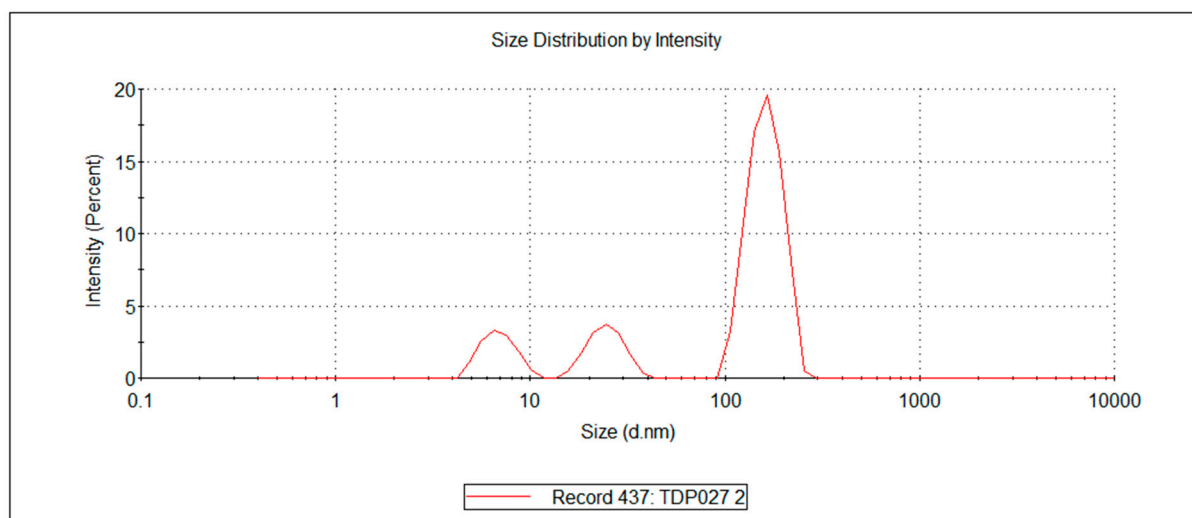

Figure S15. 1.0 g/L SDS, 20.0 V/V% MeOH

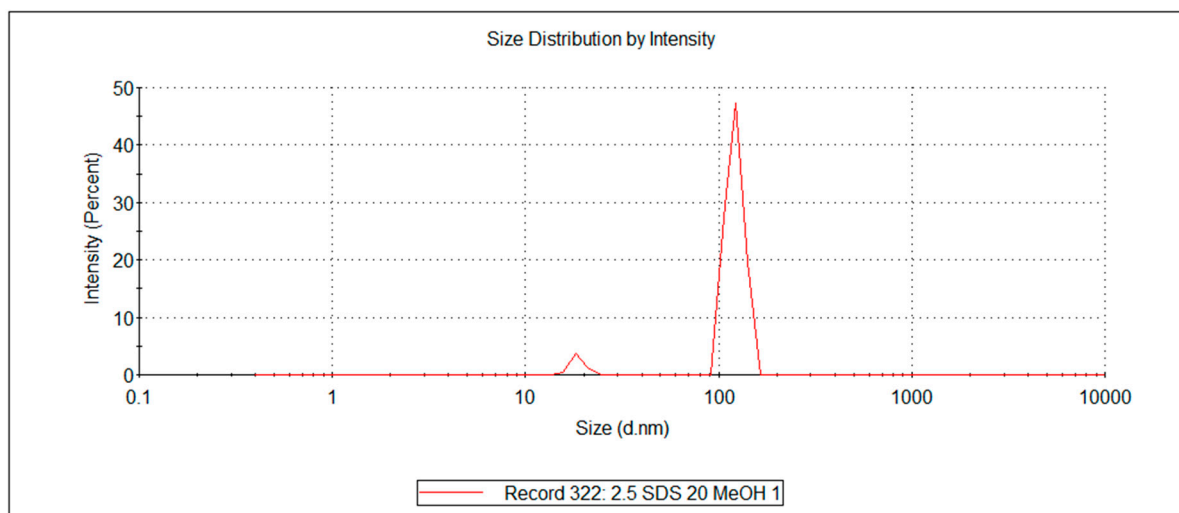

Figure S16. 2.5 g/L SDS, 20.0 V/V% MeOH

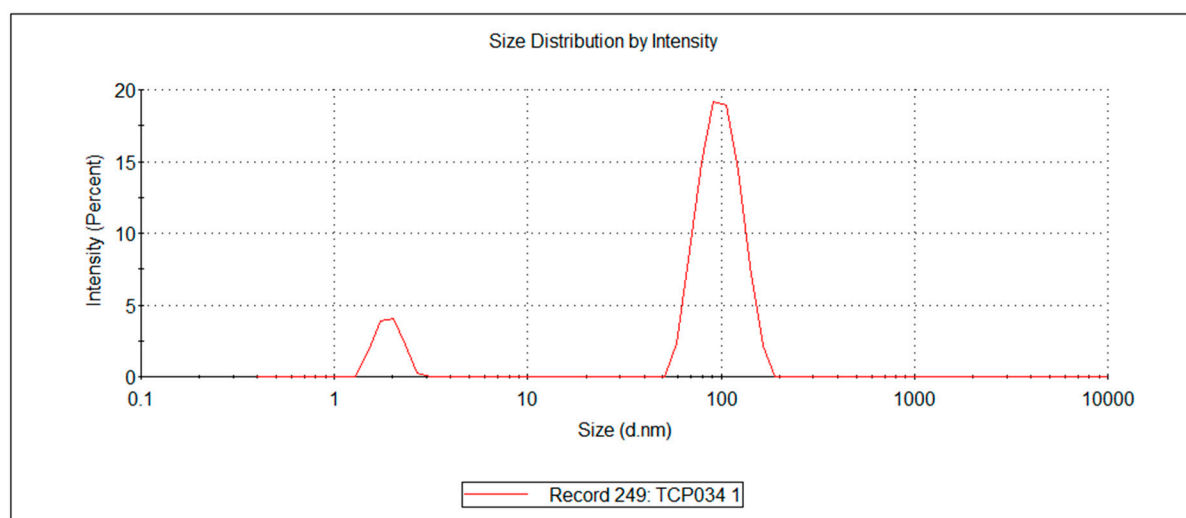

Figure S17. 5.0 g/L SDS, 20.0 V/V% MeOH

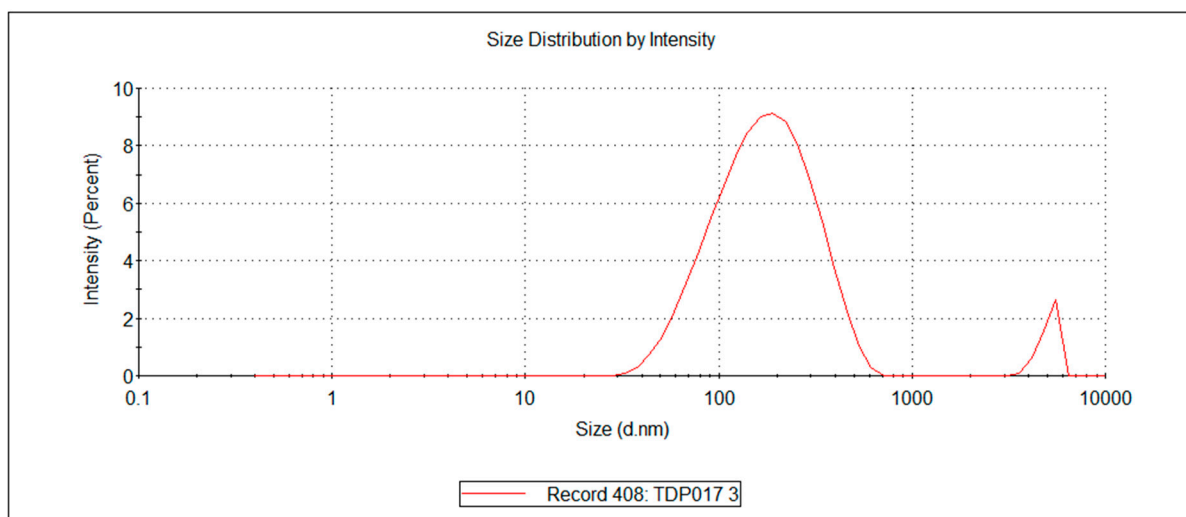

Figure S18. 0.5 g/L SDS, 5.0 V/V% EtOH

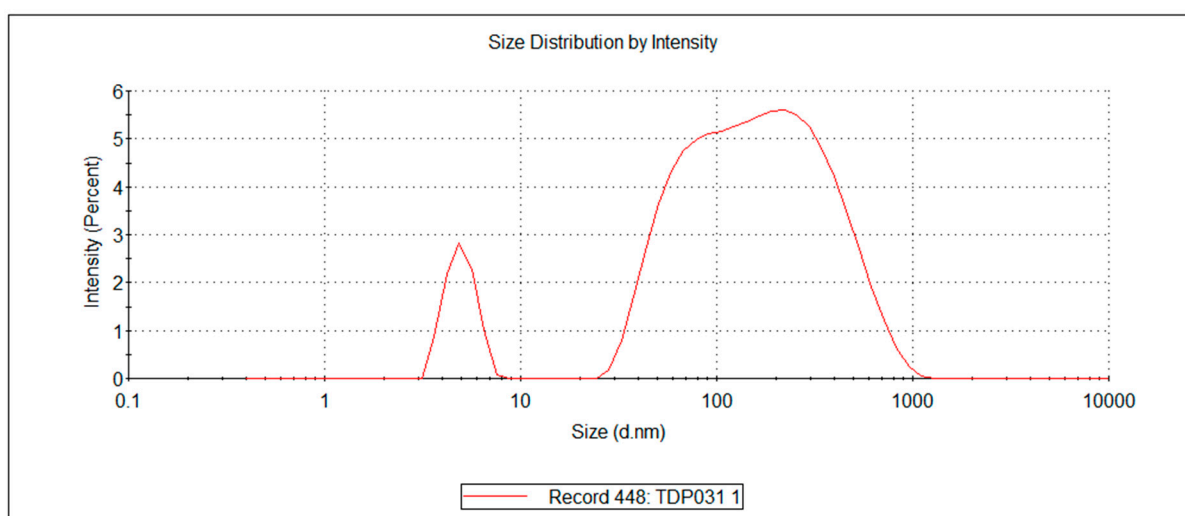

Figure S19. 1.0 g/L SDS, 5.0 V/V% EtOH

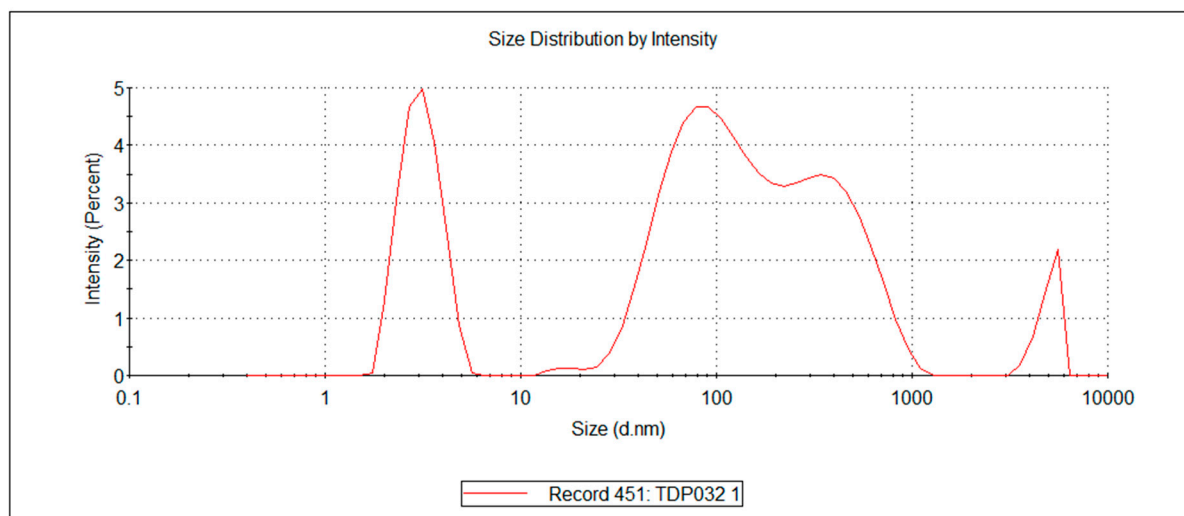

Figure S20. 2.5 g/L SDS, 5.0 V/V% EtOH

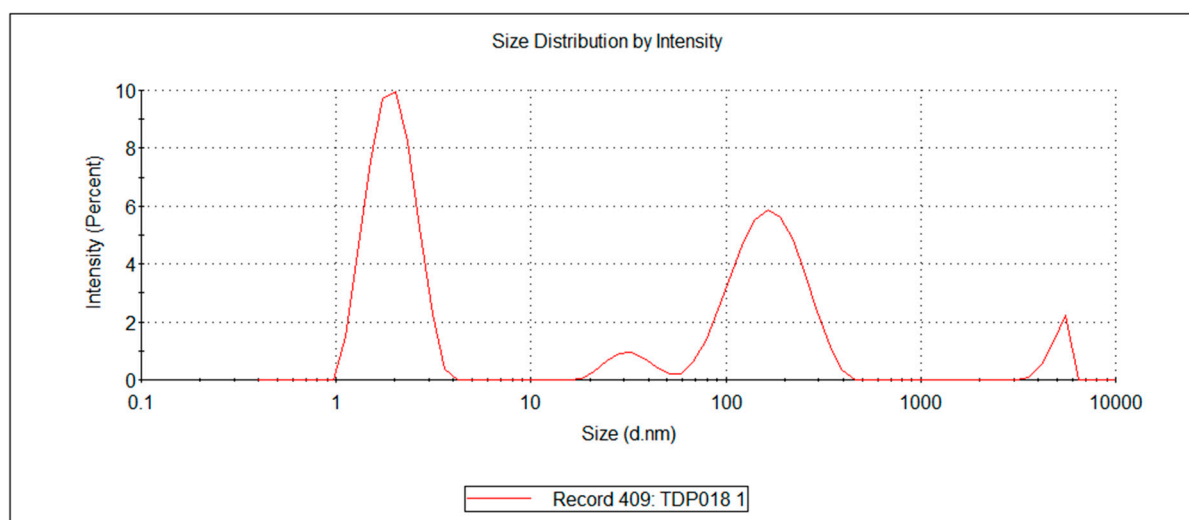

Figure S21. 5.0 g/L SDS, 5.0 V/V% EtOH

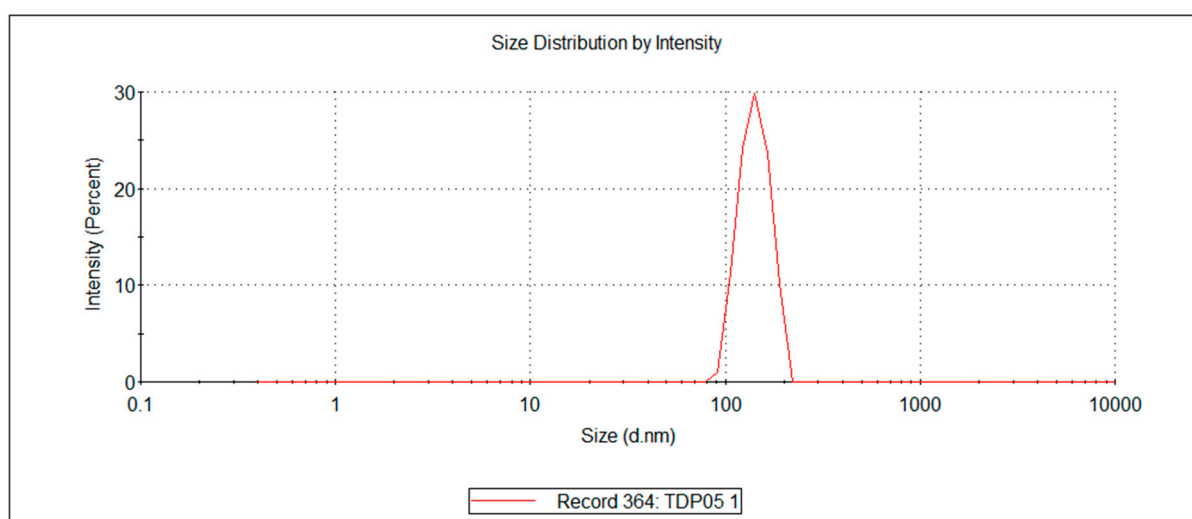



Figure S22. 0.5 g/L SDS, 10.0 V/V% EtOH

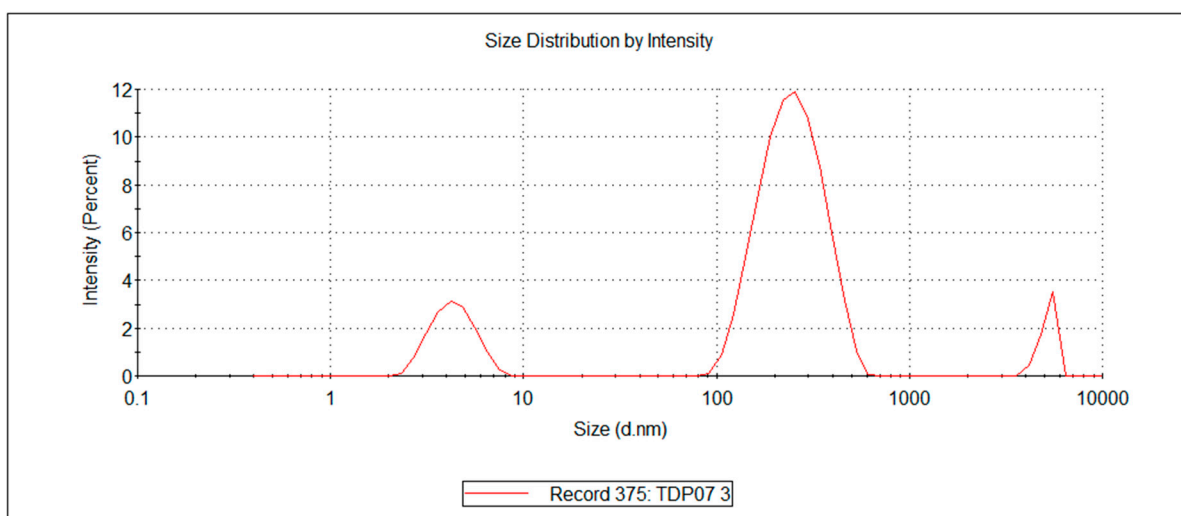

Figure S23. 1.0 g/L SDS, 10.0 V/V% EtOH

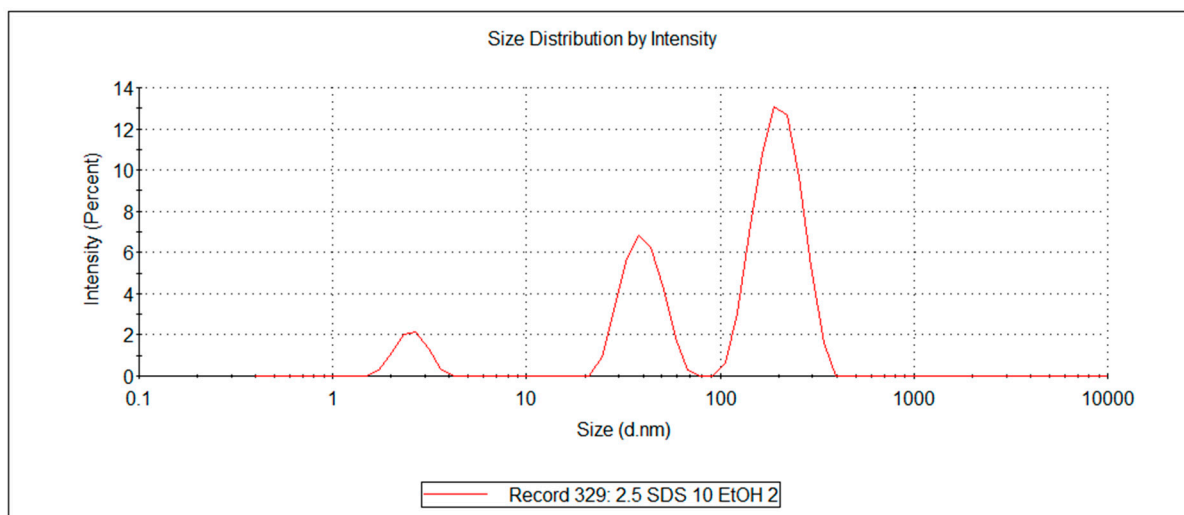

Figure S24. 2.5 g/L SDS, 10.0 V/V% EtOH

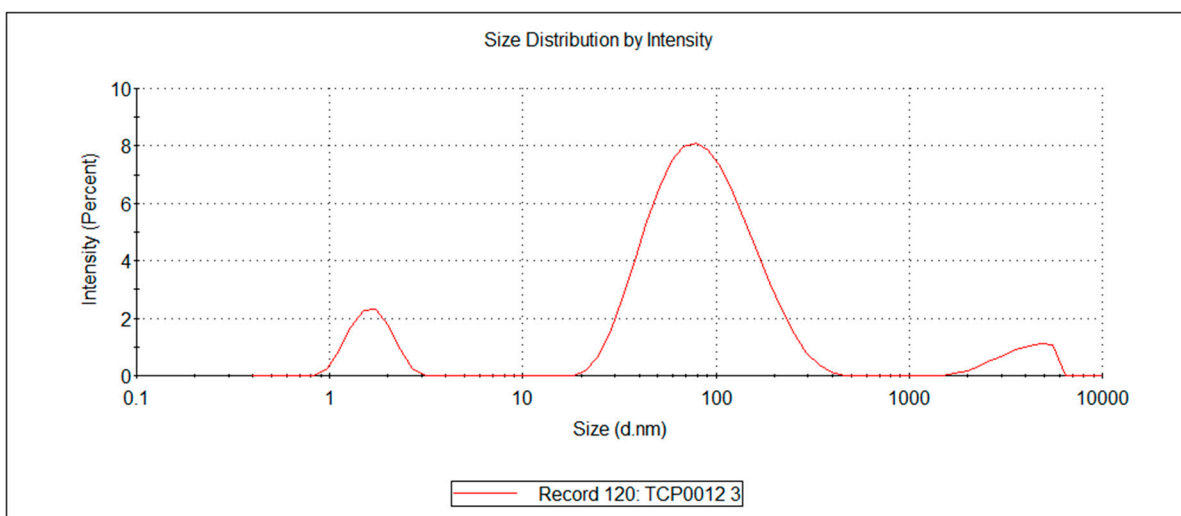

Figure S25. 5.0 g/L SDS, 10.0 V/V% EtOH

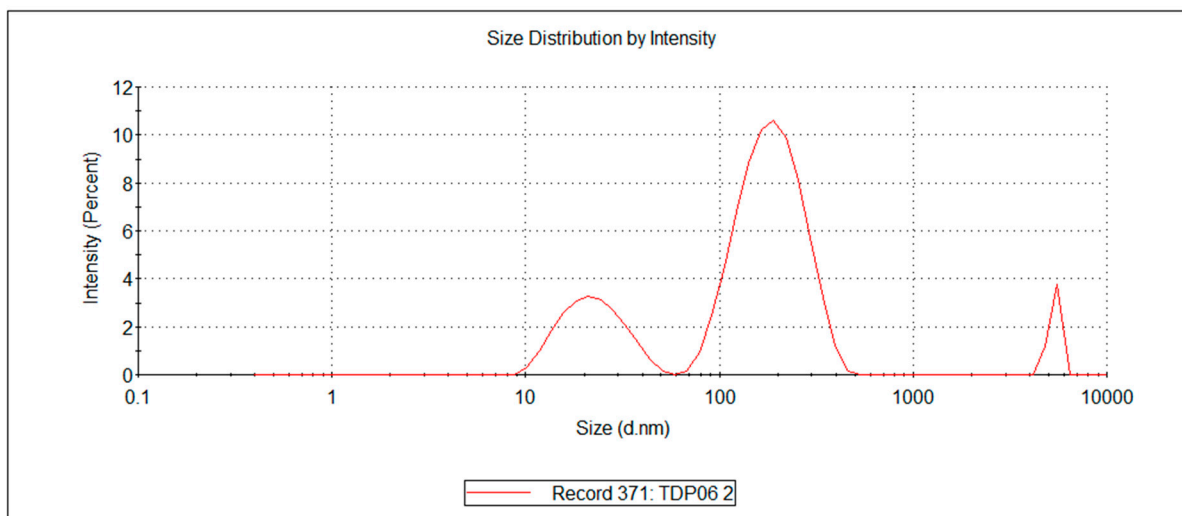

Figure S26. 0.5 g/L SDS, 20.0 V/V% EtOH

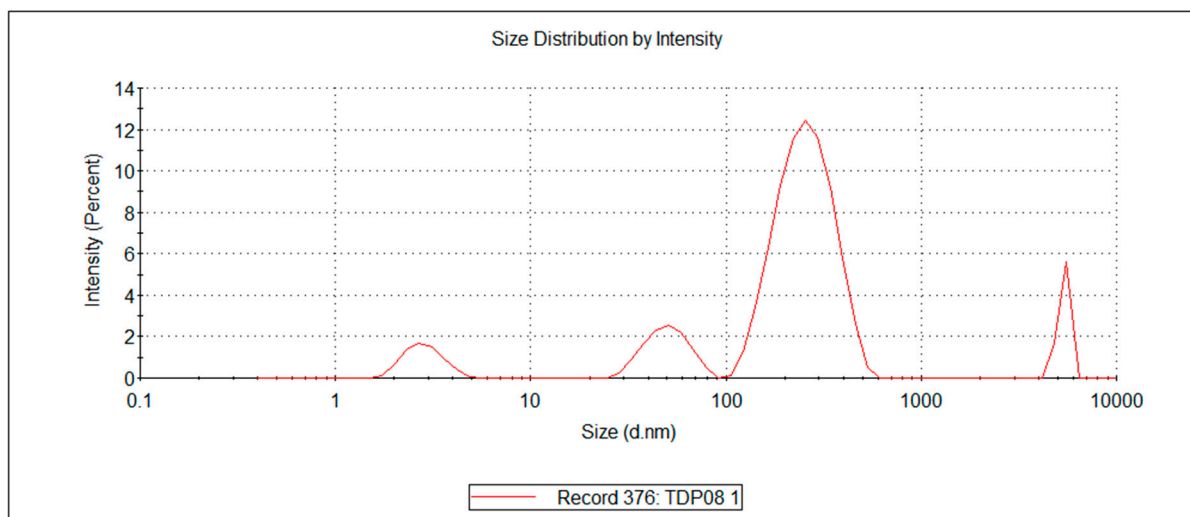

Figure S27. 1.0 g/L SDS, 20.0 V/V% EtOH

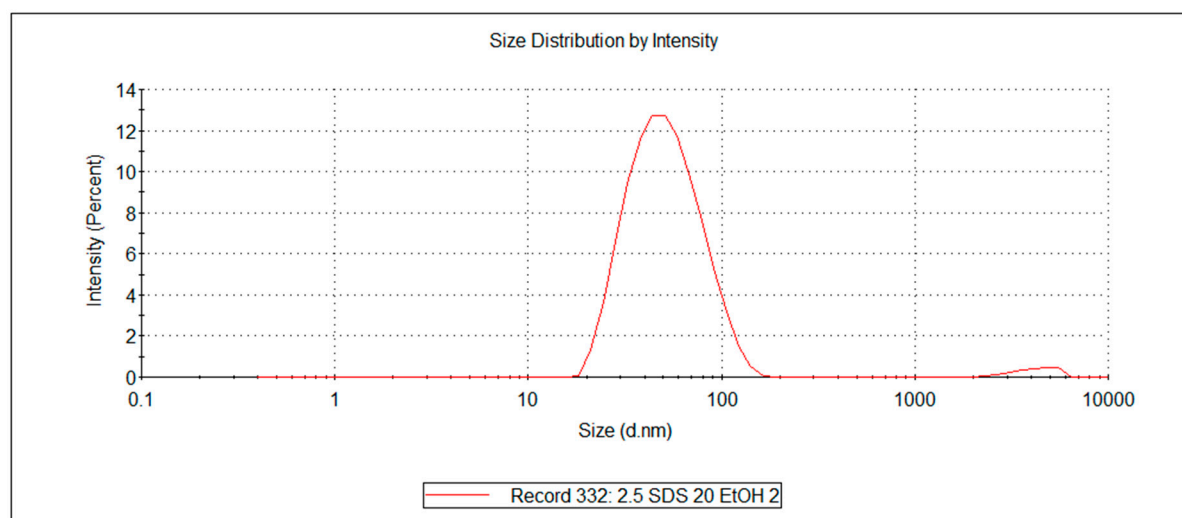

Figure S28. 2.5 g/L SDS, 20.0 V/V% EtOH

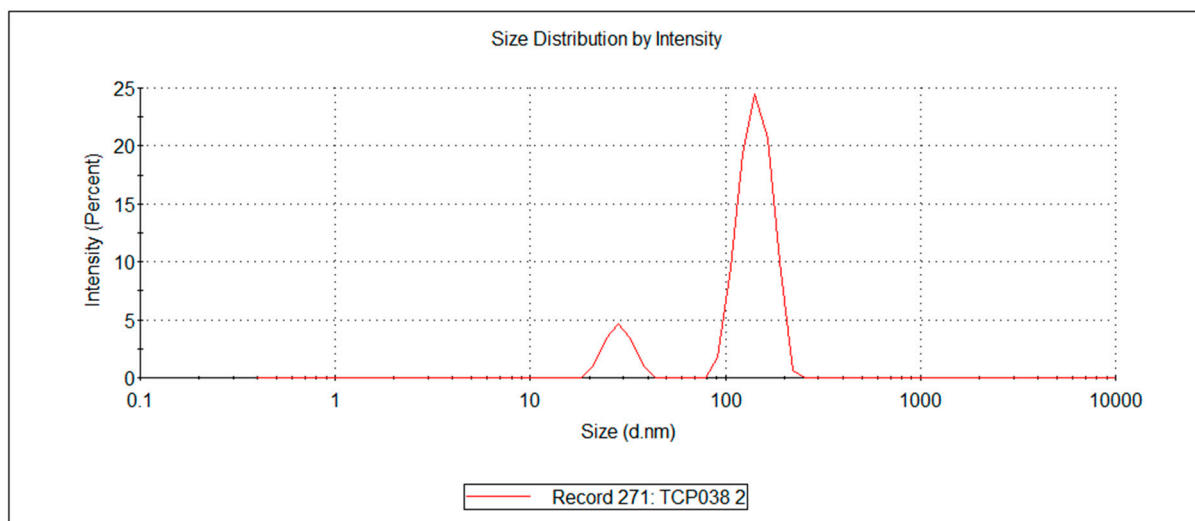

Figure S29. 5.0 g/L SDS, 20.0 V/V% EtOH

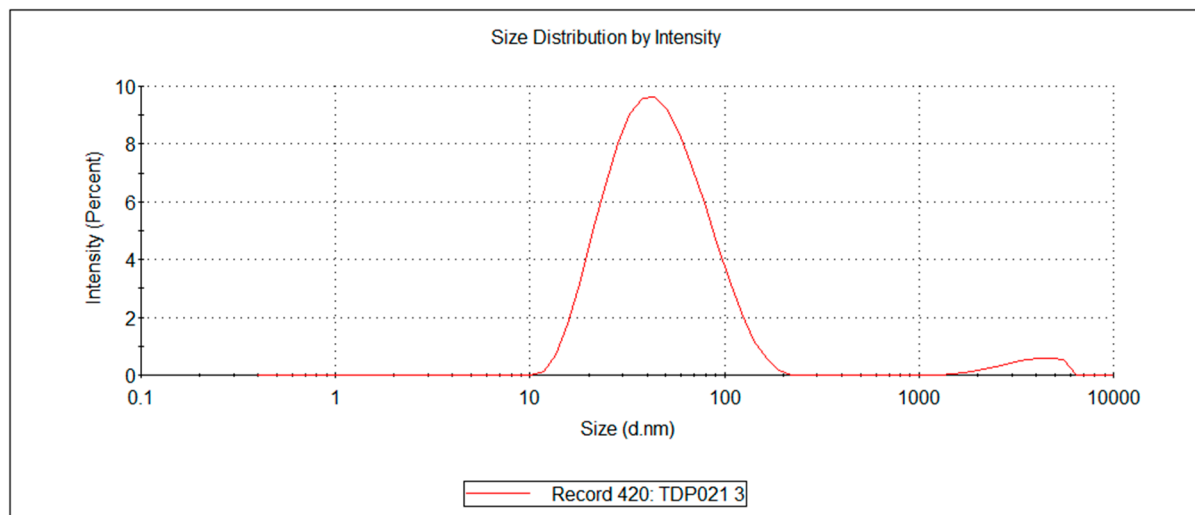

Figure S30. 0.5 g/L SDS, 5.0 V/V% *n*-propanol

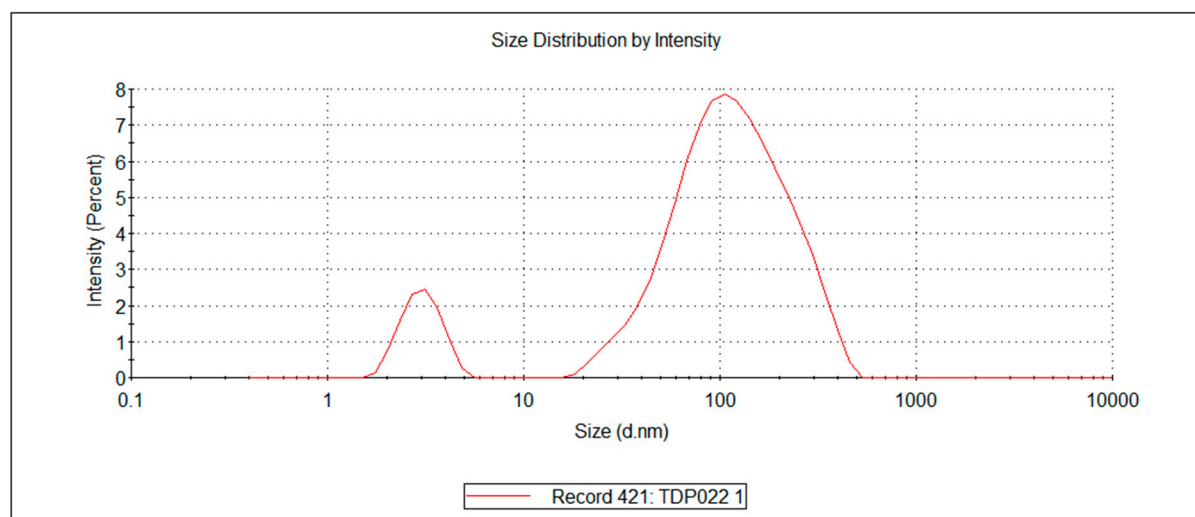

Figure S31. 1.0 g/L SDS, 5.0 V/V% *n*-propanol

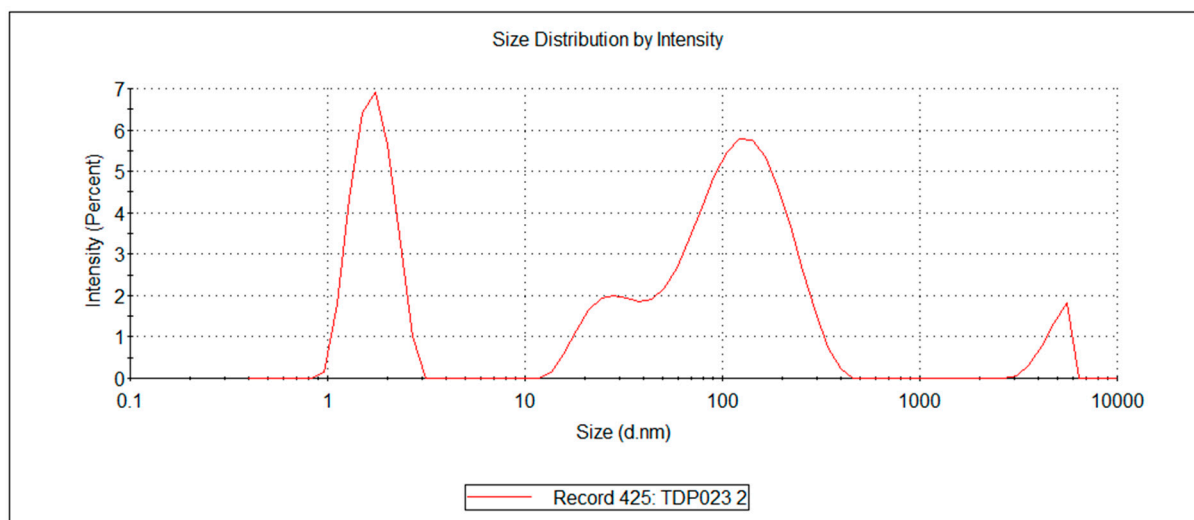

Figure S32. 2.5 g/L SDS, 5.0 V/V% *n*-propanol

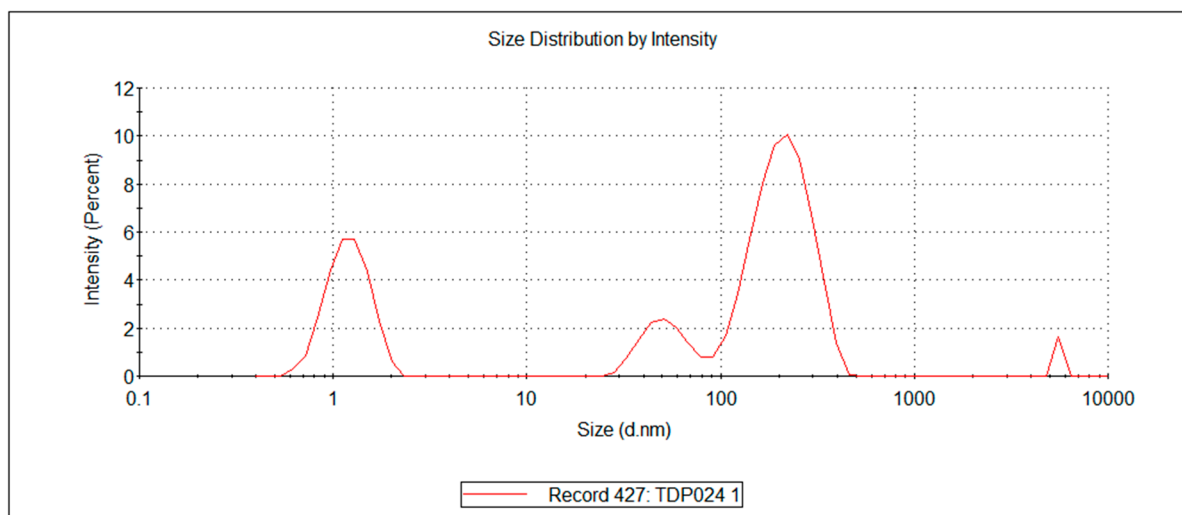

Figure S33. 5.0 g/L SDS, 5.0 V/V% *n*-propanol

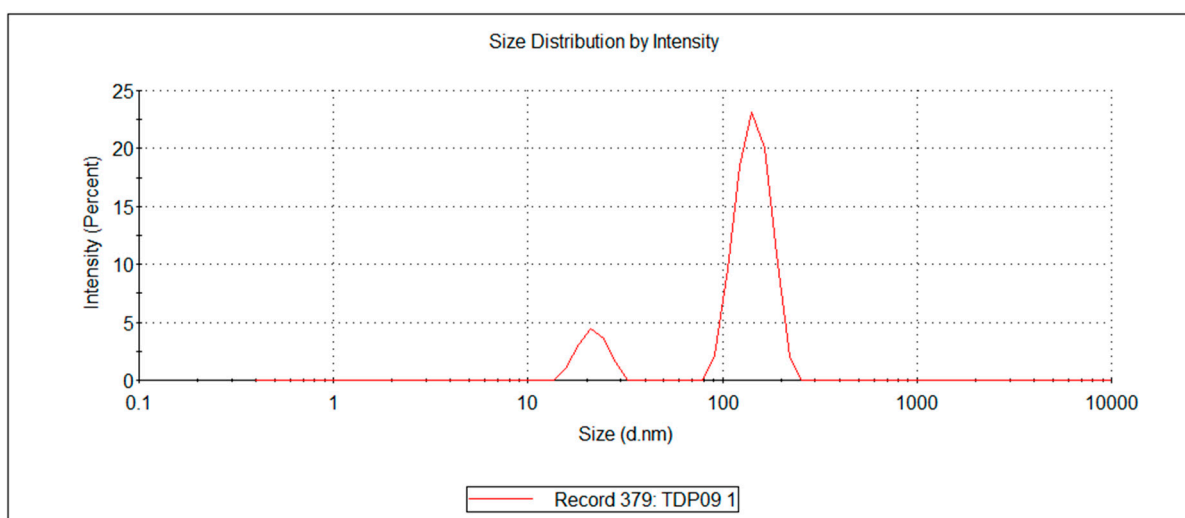

Figure S34. 0.5 g/L SDS, 10.0 V/V% *n*-propanol

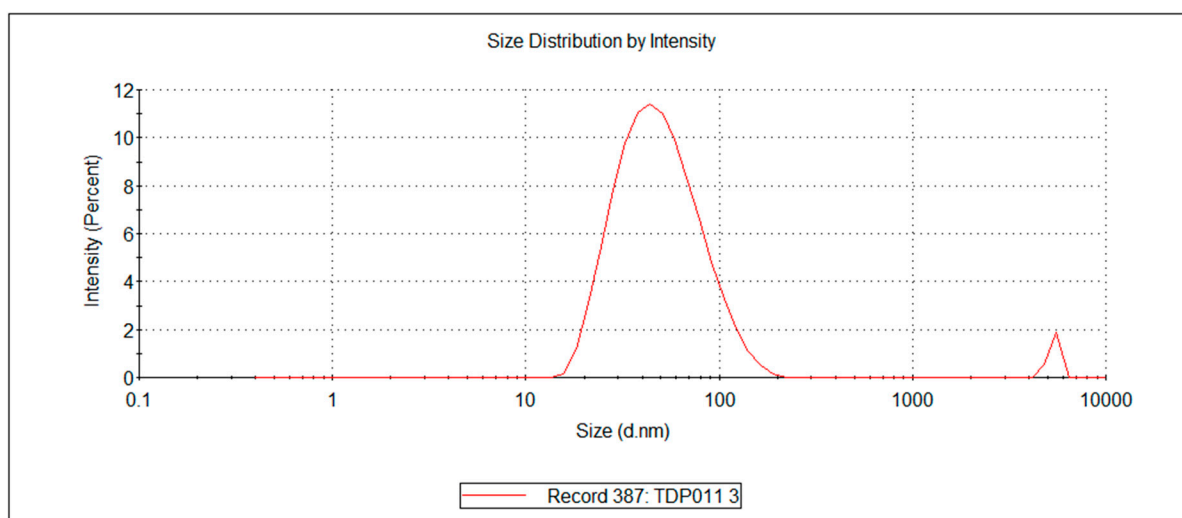

Figure S35. 1.0 g/L SDS, 10.0 V/V% *n*-propanol

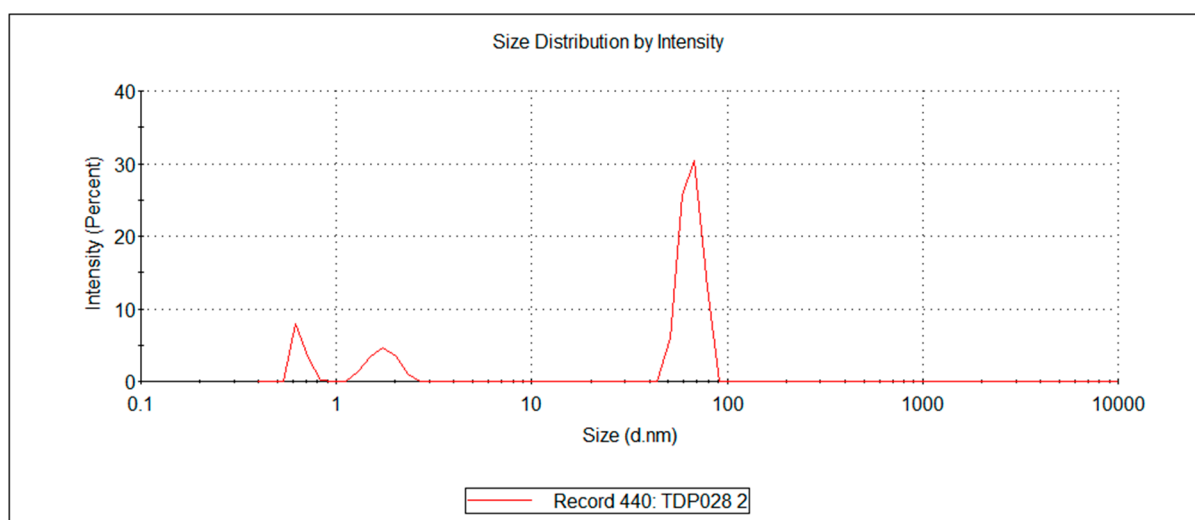

Figure S36. 2.5 g/L SDS, 10.0 V/V% *n*-propanol

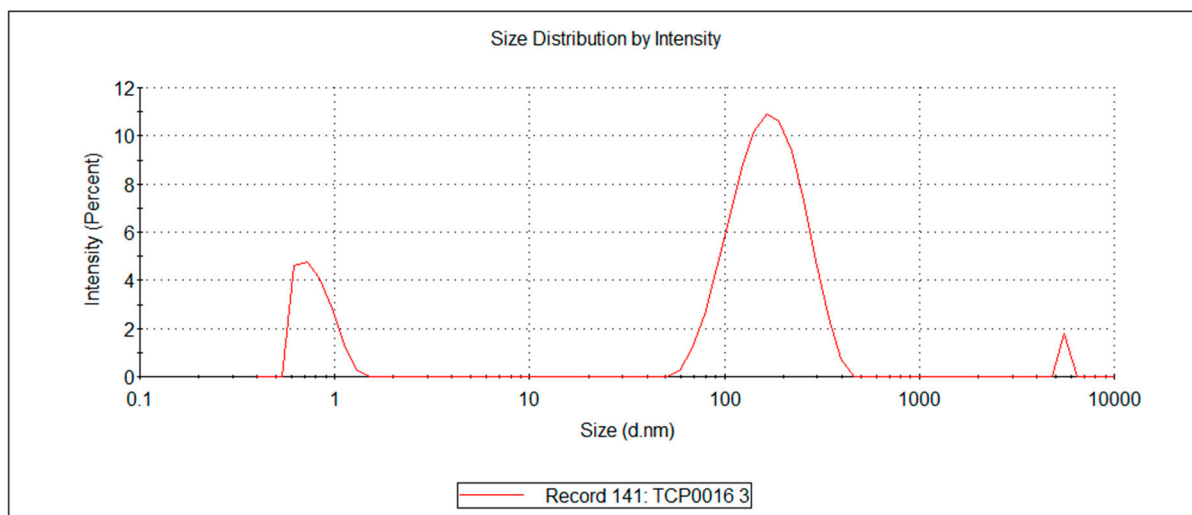

Figure S37. 5.0 g/L SDS, 10.0 V/V% *n*-propanol

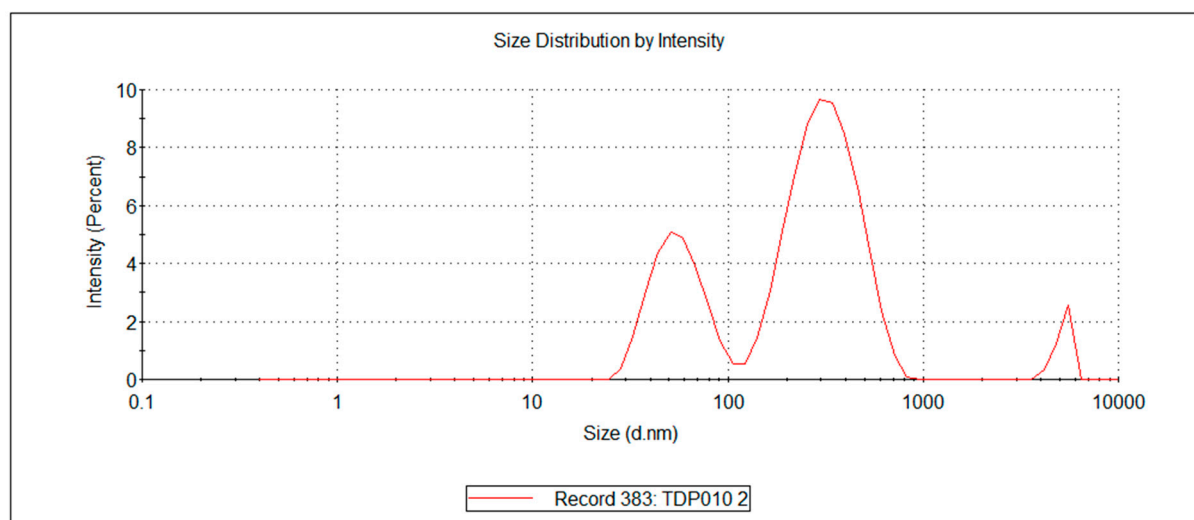

Figure S38. 0.5 g/L SDS, 20.0 V/V% *n*-propanol

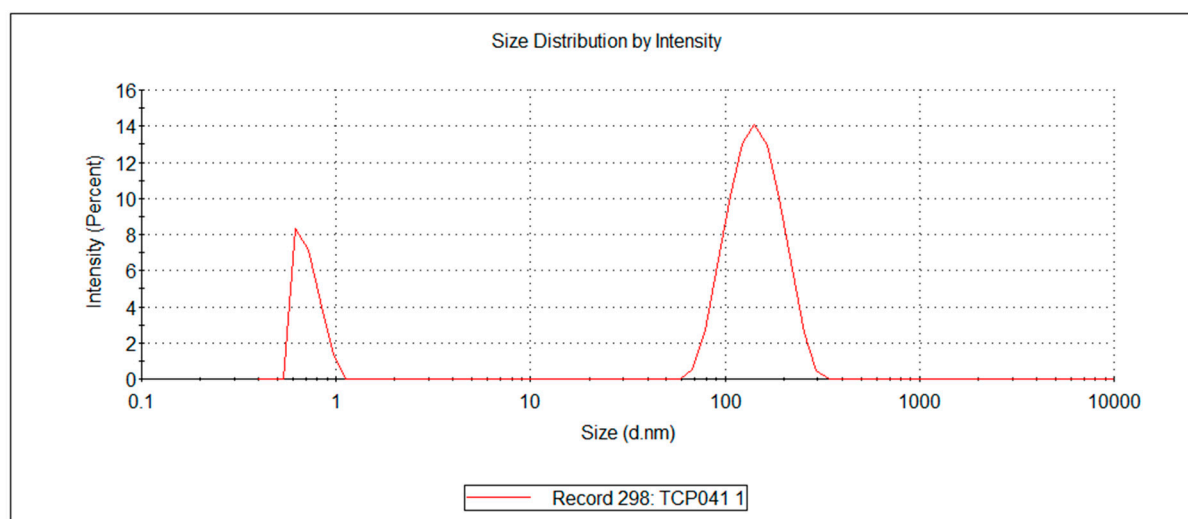

Figure S39. 1.0 g/L SDS, 20.0 V/V% *n*-propanol

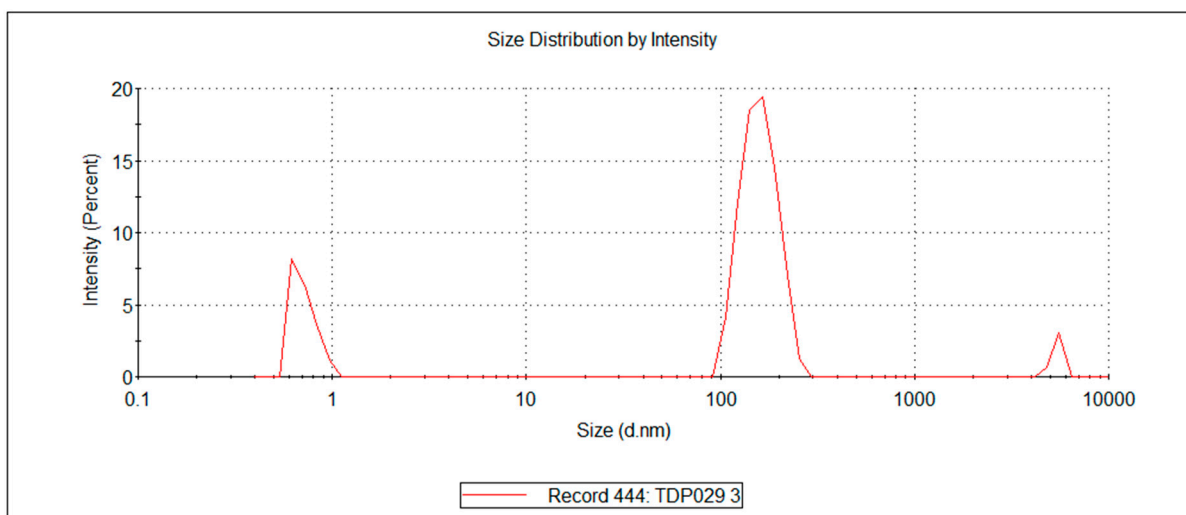

Figure S40. 2.5 g/L SDS, 20.0 V/V% *n*-propanol

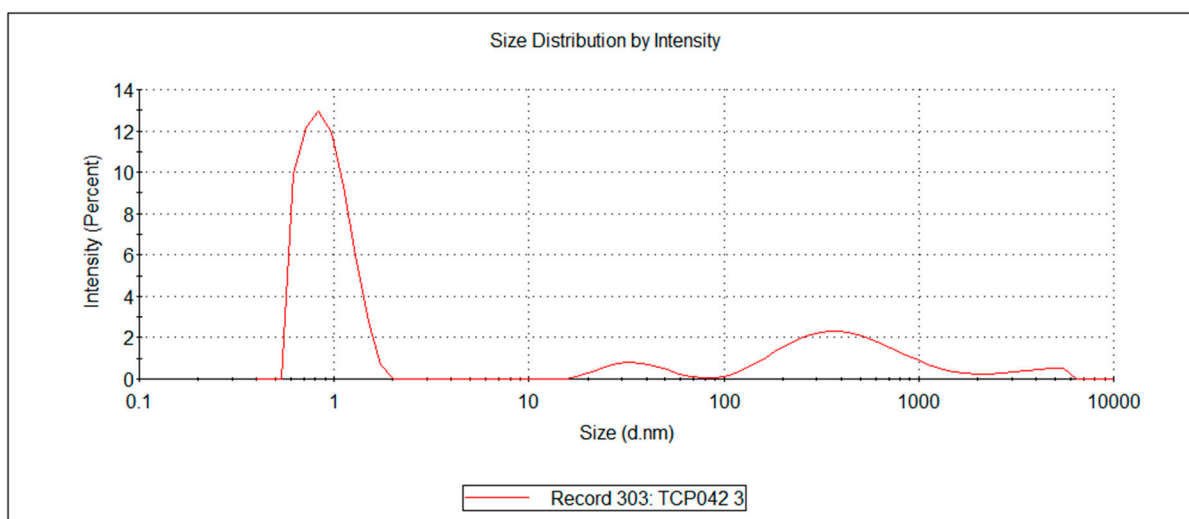

Figure S41. 5.0 g/L SDS, 20.0 V/V% *n*-propanol

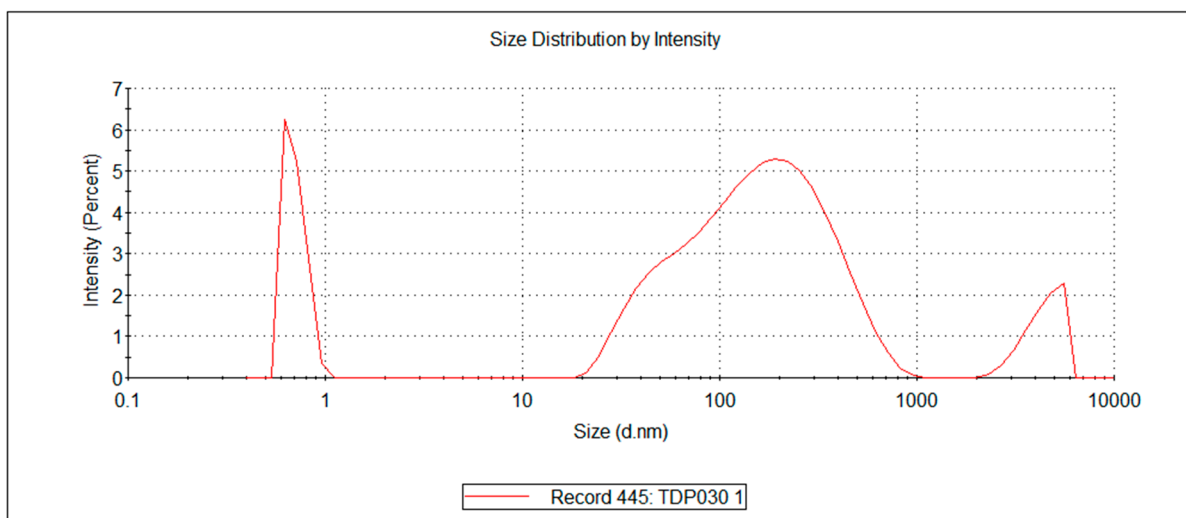

Figure S42. 0.1 g/L SDS, 5.0 V/V% *n*-butanol

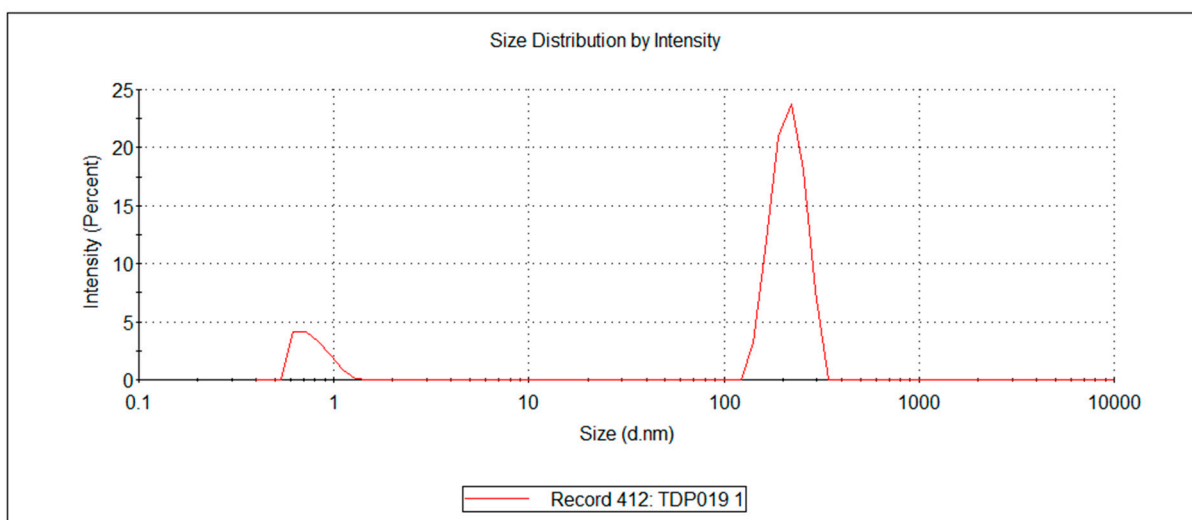

Figure S43. 0.5 g/L SDS, 5.0 V/V% *n*-butanol

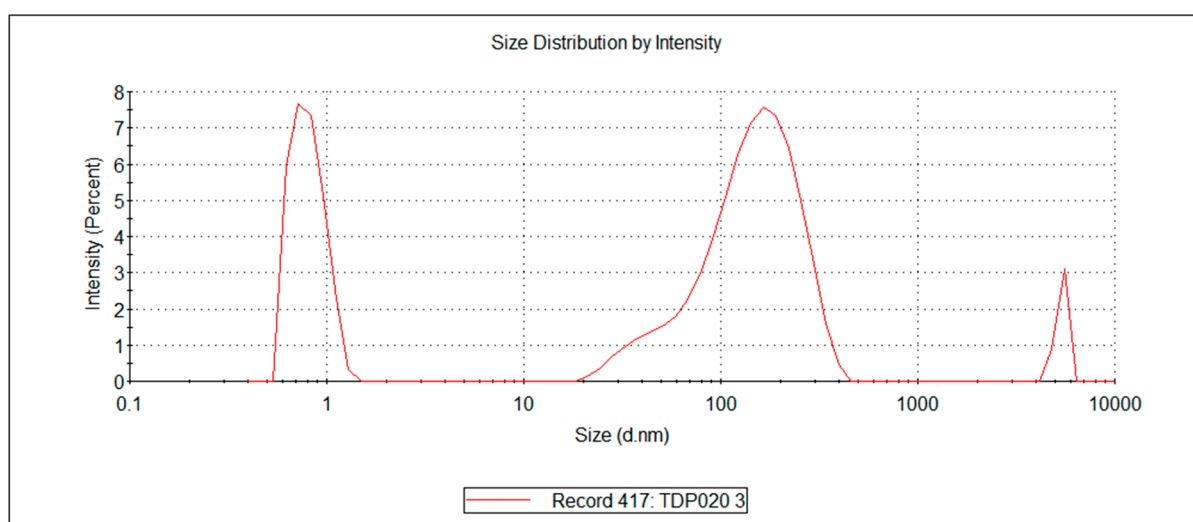

Figure S44. 1.0 g/L SDS, 5.0 V/V% *n*-butanol

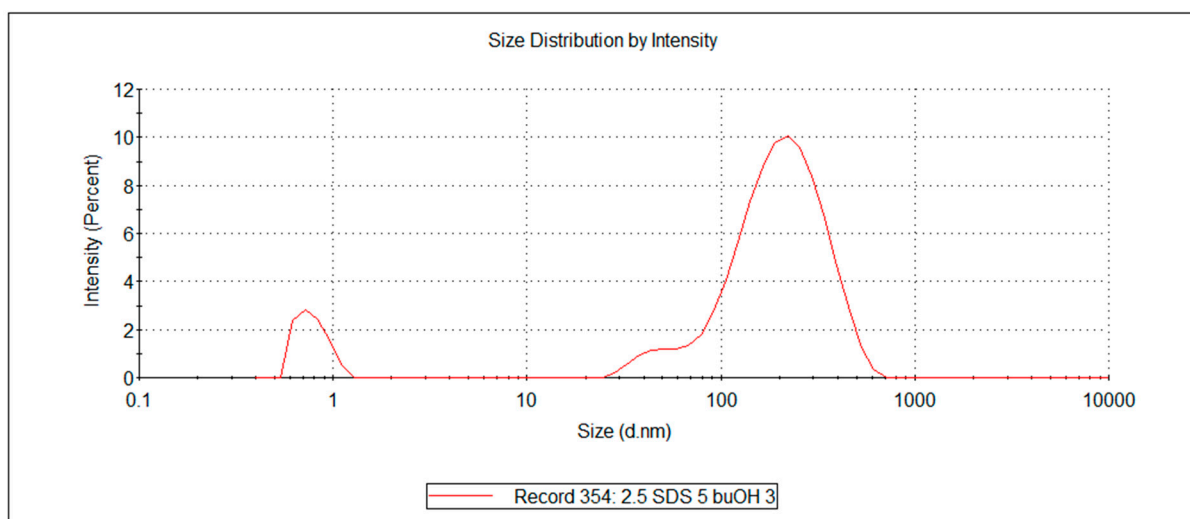

Figure S45. 2.5 g/L SDS, 5.0 V/V% *n*-butanol



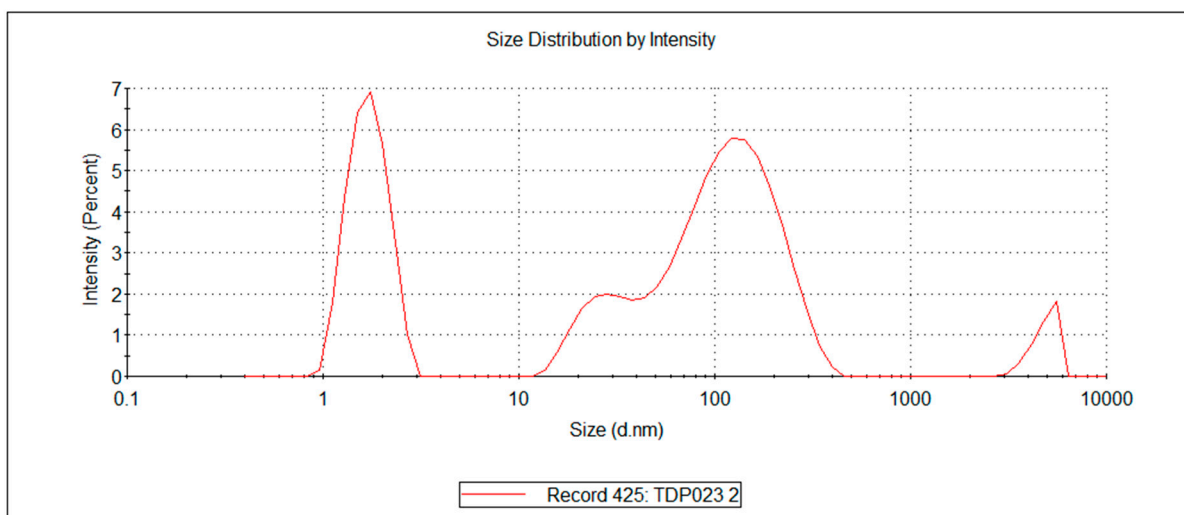

Figure S46. 5.0 g/L SDS, 5.0 V/V% *n*-butanol
